# Supplementary material for: Global, regional, and national burden of decubitus ulcers, 1990–2021: analysis of the current situation, multidimensional analysis, and trend forecasting for the global burden of disease study 2021
Source: Frontiers journal article supplement (doi:10.3389/fmed.2025.1588032), 2025-07-02
Supplement: Table_1.xlsx [file Table_1.xlsx]

## Sheet: Table S1
Table S1 The number of incident cases, prevalent cases, mortality, and DALYs of diarrheal disease in 1990, along with corresponding ASR.
Characteristics	Incidence(95% uncertainty interval)		Prevalence(95% uncertainty interval)		Mortality(95% uncertainty interval)		DALYs(95% uncertainty interval)
	Cases,1990	ASIR,1990	Cases,1990	ASPR,1990	Cases,1990	ASMR,1990	Cases,1990	ASDR,1990
Global	1142594.78(1030311.64,1276015.91)	31.50(28.42,35.24)	300442.41(270737.68,333578.99)	8.25(7.39,9.18)	16621.99(13738.32,19753.04)	0.53(0.45,0.62)	408886.98(329846.87,490564.17)	10.19(8.09,12.93)
SDI level
High SDI	595574.35(533176.91,670347.52)	56.17(50.83,63.12)	158248.50(140958.01,177683.45)	14.94(13.37,16.68)	6300.54(5644.43,6716.63)	0.59(0.52,0.63)	118417.58(108945.41,129111.86)	10.96(10.05,11.98)
High-middle SDI	195901.78(173655.48,221280.40)	20.94(18.68,23.63)	51359.63(45748.56,57840.80)	5.47(4.88,6.12)	1755.44(1573.91,2058.61)	0.25(0.22,0.29)	39479.77(35333.00,45319.85)	4.57(4.12,5.23)
Low SDI	21797.05(18569.51,25084.15)	7.81(6.87,8.92)	4806.13(4033.60,5574.07)	1.49(1.30,1.69)	1665.00(1006.82,2654.54)	0.84(0.52,1.38)	52921.58(30687.93,80593.86)	19.55(11.90,30.98)
Low-middle SDI	92261.03(80242.68,104378.09)	12.84(11.43,14.20)	23764.36(20538.86,26812.48)	3.17(2.82,3.51)	3158.96(1893.72,4272.17)	0.63(0.39,0.85)	96731.88(60095.63,127790.69)	13.99(8.67,18.65)
Middle SDI	235605.69(208017.02,262534.88)	21.95(19.81,24.36)	61883.46(55093.66,69122.96)	5.67(5.12,6.27)	3716.62(2967.86,4635.44)	0.53(0.43,0.67)	100750.04(80363.49,123170.71)	10.15(8.26,12.48)
GBD Region
Andean Latin America	6336.73(5624.61,7041.07)	28.75(25.77,32.24)	1702.78(1529.08,1886.58)	7.70(6.95,8.61)	109.10(78.75,135.45)	0.61(0.45,0.77)	2687.25(1902.05,3320.43)	12.00(8.87,14.57)
Australasia	4069.19(3629.23,4587.67)	18.24(16.28,20.40)	1082.32(968.66,1216.35)	4.86(4.34,5.42)	51.48(44.75,56.62)	0.25(0.21,0.27)	899.21(807.98,985.22)	4.06(3.64,4.47)
Caribbean	11303.57(10230.12,12566.52)	44.04(39.68,48.92)	2982.68(2707.90,3296.97)	11.54(10.43,12.72)	447.95(397.91,517.30)	2.02(1.80,2.31)	9406.75(7968.04,11355.09)	36.67(31.98,43.39)
Central Asia	2083.22(1803.78,2419.61)	4.54(3.98,5.29)	549.76(474.65,636.09)	1.20(1.04,1.38)	3.83(2.62,5.17)	0.01(0.01,0.01)	191.50(145.45,252.15)	0.40(0.31,0.51)
Central Europe	59836.55(52850.77,69214.12)	46.32(41.42,52.92)	15769.80(13977.73,18093.86)	12.25(10.87,14.02)	70.55(62.68,80.44)	0.05(0.05,0.06)	4009.89(3220.10,4956.58)	2.98(2.39,3.69)
Central Latin America	78796.58(70917.65,86920.11)	88.00(79.43,97.47)	21188.62(19127.99,23317.97)	23.54(21.08,26.12)	937.46(892.99,973.71)	1.35(1.27,1.41)	24679.83(23229.32,26138.04)	28.02(26.55,29.63)
Central Sub-Saharan Africa	1606.21(1372.34,1863.79)	6.98(6.25,7.92)	324.33(265.89,385.50)	1.06(0.92,1.21)	209.84(66.51,326.15)	1.28(0.43,1.93)	6085.46(1905.77,9631.32)	26.08(8.63,40.04)
East Asia	166381.52(145571.97,187252.12)	18.10(16.19,20.28)	43575.19(38156.42,49243.54)	4.67(4.17,5.22)	579.55(448.51,1057.36)	0.15(0.11,0.28)	19107.46(14771.73,28995.42)	2.79(2.20,4.50)
Eastern Europe	62634.98(55203.27,71535.34)	25.51(22.66,28.82)	16674.58(14729.20,19004.24)	6.81(6.07,7.67)	50.81(44.83,56.78)	0.02(0.02,0.02)	4155.66(3207.19,5241.37)	1.64(1.26,2.07)
Eastern Sub-Saharan Africa	6236.09(5177.70,7511.17)	8.75(7.36,10.51)	631.64(481.00,796.48)	0.51(0.43,0.61)	1185.36(687.04,2245.61)	1.84(1.03,3.58)	36772.37(20945.13,65925.45)	41.07(23.89,77.51)
High-income Asia Pacific	86053.94(77292.15,96223.78)	47.43(42.77,52.62)	23286.68(20830.67,25958.84)	12.82(11.53,14.17)	412.46(351.34,457.72)	0.26(0.22,0.29)	10308.93(8708.90,12018.36)	5.79(4.91,6.73)
High-income North America	413596.23(367841.16,467543.53)	115.74(103.63,130.07)	110717.51(97592.85,124746.89)	31.01(27.49,34.76)	1731.50(1537.84,1841.27)	0.47(0.42,0.50)	44412.62(39149.79,50523.95)	12.40(10.90,14.11)
North Africa and Middle East	24794.83(21279.14,28066.17)	11.76(10.37,13.25)	6492.94(5554.30,7353.72)	2.95(2.59,3.30)	899.15(649.30,1335.05)	0.72(0.51,1.10)	22354.81(16395.63,31147.36)	13.35(9.82,19.39)
Oceania	148.87(126.01,174.04)	5.69(5.08,6.51)	30.85(25.42,36.62)	1.06(0.93,1.21)	22.83(9.50,51.57)	1.05(0.50,2.42)	683.40(269.54,1554.61)	22.08(9.63,49.50)
South Asia	79216.04(67580.74,90984.48)	9.44(8.21,10.70)	20721.96(17518.32,23866.92)	2.35(2.03,2.68)	2520.55(1433.81,3693.48)	0.50(0.28,0.76)	87407.04(54522.14,123268.37)	12.36(7.33,17.78)
Southeast Asia	14713.51(12964.79,16810.28)	6.24(5.58,7.08)	3180.76(2751.68,3667.21)	1.20(1.07,1.37)	1930.38(1326.75,2882.99)	0.98(0.66,1.50)	49292.73(32633.98,71880.56)	18.82(12.92,27.91)
Southern Latin America	6634.38(5911.97,7530.47)	15.37(13.69,17.38)	1683.77(1505.20,1894.38)	3.88(3.49,4.37)	343.43(305.60,376.66)	0.85(0.75,0.93)	5934.70(5371.98,6477.64)	13.69(12.35,14.90)
Southern Sub-Saharan Africa	6465.42(5644.71,7274.82)	18.66(16.82,20.53)	1621.96(1414.37,1815.17)	4.36(3.91,4.80)	362.76(199.52,516.36)	1.75(0.96,2.52)	7460.74(3992.33,10381.92)	28.94(15.72,40.97)
Tropical Latin America	38719.51(34872.45,42635.23)	40.57(36.98,44.48)	10184.83(9243.81,11208.28)	10.58(9.59,11.53)	506.37(466.47,535.67)	0.71(0.64,0.76)	13100.02(12263.39,13924.21)	14.43(13.42,15.34)
Western Europe	68732.30(61660.57,77182.96)	12.60(11.32,14.05)	16926.49(15221.82,18921.55)	3.10(2.81,3.44)	4228.11(3778.40,4498.21)	0.73(0.65,0.78)	59304.62(54350.60,62699.02)	10.16(9.29,10.73)
Western Sub-Saharan Africa	4235.13(3462.38,5041.59)	3.37(2.88,3.89)	1112.98(899.00,1335.49)	0.85(0.72,0.99)	18.52(3.62,34.91)	0.03(0.01,0.05)	631.99(290.88,1009.95)	0.65(0.25,1.08)

## Sheet: Table S2
Table S2 The number of incident cases, prevalent cases, mortality, and DALYs of DUs at the National Level in 2021, along with corresponding ASR and temporal trends.
Characteristics	Incidence(95% uncertainty interval)			Prevalence(95% uncertainty interval)			Mortality(95% uncertainty interval)			DALYs(95% uncertainty interval)
	Cases,2021	ASIR,2021	AAPC 1990-2021	Cases,2021	ASPR,2021	AAPC 1990-2021	Cases,2021	ASMR,2021	AAPC 1990-2021	Cases,2021	ASDR,2021	AAPC 1990-2021
Afghanistan	1812.07(1531.82,2076.47)	11.73(10.34,13.20)	0.46(0.40,0.51)	449.09(376.05,519.94)	2.47(2.17,2.77)	-0.13(-0.20,-0.07)	102.34(62.45,144.67)	1.44(0.89,2.13)	0.82(0.69,0.95)	2717.49(1627.96,3787.00)	26.14(16.39,36.78)	0.76(0.65,0.86)
Albania	1586.92(1391.23,1847.09)	40.36(35.71,46.20)	-0.22(-0.28,-0.15)	418.50(365.39,484.73)	10.68(9.48,12.26)	-0.21(-0.28,-0.15)	1.81(0.74,3.11)	0.04(0.02,0.08)	0.15(-0.50,0.79)	99.64(69.13,135.16)	2.52(1.77,3.41)	0.39(0.32,0.46)
Algeria	4018.62(3497.46,4539.47)	11.29(9.93,12.58)	0.33(0.25,0.42)	1030.66(892.31,1170.62)	2.66(2.34,2.97)	-0.12(-0.17,-0.08)	225.78(164.03,300.16)	1.00(0.73,1.32)	1.36(1.03,1.69)	4261.49(2981.11,5622.22)	14.73(10.66,19.17)	1.56(1.34,1.77)
American Samoa	8.25(7.51,9.16)	20.20(18.55,22.29)	1.31(0.78,1.85)	0.84(0.75,0.93)	2.01(1.82,2.22)	0.35(0.16,0.54)	1.78(0.95,3.04)	4.37(2.47,7.17)	0.76(0.41,1.12)	44.17(22.01,76.90)	93.50(49.84,161.93)	1.28(0.71,1.86)
Andorra	6.86(6.06,7.89)	4.56(4.00,5.25)	-0.36(-0.42,-0.30)	1.77(1.55,2.06)	1.19(1.04,1.38)	-0.35(-0.41,-0.29)	0.13(0.08,0.17)	0.07(0.05,0.09)	-1.12(-1.24,-1.00)	1.94(1.36,2.57)	1.17(0.82,1.56)	-1.20(-1.40,-1.01)
Angola	815.45(677.41,956.54)	6.22(5.57,7.04)	-0.98(-1.52,-0.44)	171.80(138.61,210.44)	0.90(0.77,1.03)	-0.21(-0.26,-0.16)	92.58(35.35,167.16)	1.11(0.49,1.96)	-1.54(-2.15,-0.92)	2620.18(893.92,4850.83)	21.41(8.51,38.26)	-2.16(-3.36,-0.95)
Antigua and Barbuda	73.57(67.35,80.10)	78.57(72.12,85.61)	0.62(0.56,0.68)	19.48(17.70,21.29)	20.72(18.84,22.49)	0.58(0.53,0.64)	5.74(5.18,6.23)	6.67(6.00,7.25)	2.62(2.29,2.96)	103.84(95.12,111.94)	108.79(99.70,116.96)	1.40(0.95,1.86)
Argentina	9823.98(8968.74,10850.42)	16.99(15.47,18.72)	1.27(0.98,1.56)	2462.81(2198.16,2727.39)	4.27(3.82,4.72)	1.19(0.92,1.46)	1234.56(1075.33,1356.21)	2.09(1.82,2.30)	3.53(2.98,4.09)	18524.71(16554.10,20154.50)	32.06(28.72,34.98)	3.70(2.82,4.58)
Armenia	147.09(127.82,171.65)	3.60(3.14,4.17)	0.18(0.11,0.25)	39.13(34.01,45.22)	0.96(0.84,1.10)	0.19(0.12,0.26)	3.55(2.71,4.55)	0.08(0.06,0.10)	4.15(3.24,5.08)	68.55(52.14,88.72)	1.59(1.20,2.05)	3.65(2.55,4.77)
Australia	5673.83(5001.46,6446.99)	13.88(12.17,15.60)	-0.61(-0.63,-0.58)	1512.46(1334.43,1713.03)	3.72(3.29,4.18)	-0.60(-0.63,-0.58)	57.18(45.52,66.11)	0.10(0.08,0.12)	-2.33(-3.13,-1.52)	903.73(760.19,1036.34)	1.86(1.58,2.13)	-3.60(-4.25,-2.95)
Austria	2441.22(2179.15,2767.54)	15.04(13.43,17.02)	-1.65(-2.24,-1.07)	612.44(546.70,686.91)	3.83(3.42,4.35)	-1.58(-2.14,-1.01)	20.25(16.01,23.92)	0.08(0.06,0.10)	-2.36(-2.70,-2.02)	331.68(281.18,381.40)	1.64(1.39,1.92)	-2.40(-2.59,-2.20)
Azerbaijan	386.07(332.93,451.55)	4.40(3.82,5.11)	0.03(-0.01,0.07)	102.02(87.62,119.02)	1.17(1.01,1.34)	0.05(0.01,0.09)	1.49(0.19,3.47)	0.01(0.00,0.03)	0.37(-0.32,1.07)	64.37(22.63,127.15)	0.61(0.24,1.15)	0.62(-0.13,1.38)
Bahamas	297.80(274.06,326.07)	82.20(74.89,89.97)	0.17(0.10,0.24)	79.29(72.33,86.46)	21.81(19.84,23.79)	0.16(0.09,0.23)	23.71(19.60,28.43)	7.09(5.90,8.49)	0.65(0.44,0.87)	474.22(388.44,576.57)	126.51(104.35,152.93)	-0.02(-0.18,0.15)
Bahrain	199.52(173.33,225.62)	30.03(26.59,33.75)	-0.65(-1.08,-0.22)	42.05(35.56,48.18)	3.11(2.74,3.49)	0.39(0.33,0.44)	15.18(6.58,25.49)	5.11(2.29,8.30)	-1.52(-1.92,-1.12)	271.99(110.13,479.53)	65.89(30.47,106.99)	-1.42(-2.15,-0.69)
Bangladesh	14096.90(12106.00,15988.12)	10.56(9.29,11.92)	0.06(-0.05,0.17)	3268.57(2763.76,3763.30)	2.03(1.74,2.33)	-0.11(-0.15,-0.08)	590.63(271.31,1008.31)	0.82(0.35,1.46)	1.14(0.88,1.41)	7264.19(3964.81,11255.38)	8.59(4.27,14.38)	0.55(0.23,0.88)
Barbados	543.28(496.40,597.71)	109.53(100.44,119.73)	-0.15(-0.25,-0.05)	141.66(127.61,156.62)	28.58(25.94,31.48)	0.02(-0.06,0.11)	63.32(51.45,74.36)	12.41(10.11,14.59)	-0.80(-0.95,-0.64)	979.36(798.39,1171.50)	196.36(160.49,235.17)	-1.08(-1.29,-0.87)
Belarus	3538.12(3120.98,4064.84)	25.07(22.23,28.28)	-0.13(-0.17,-0.08)	936.71(824.65,1068.72)	6.66(5.94,7.50)	-0.12(-0.17,-0.08)	16.53(13.63,19.82)	0.11(0.09,0.13)	2.02(1.67,2.37)	529.84(440.65,623.26)	3.72(3.08,4.38)	0.37(0.21,0.54)
Belgium	3359.89(3020.69,3714.97)	13.69(12.39,15.08)	-1.02(-1.74,-0.29)	813.37(720.76,908.89)	3.40(3.05,3.77)	-0.87(-1.59,-0.14)	242.14(191.33,281.50)	0.75(0.60,0.87)	-2.43(-2.99,-1.86)	3000.02(2447.59,3404.09)	10.54(8.87,11.83)	-3.96(-4.26,-3.66)
Belize	114.76(103.83,125.86)	38.05(34.48,41.98)	-0.33(-0.40,-0.25)	30.27(27.35,33.28)	9.96(8.93,11.00)	-0.33(-0.41,-0.26)	2.65(2.29,2.99)	1.06(0.92,1.21)	0.37(-0.03,0.77)	52.44(46.12,58.77)	18.49(16.14,20.73)	-0.81(-1.29,-0.32)
Benin	275.27(222.95,332.93)	3.33(2.87,3.84)	0.09(0.03,0.15)	72.37(58.09,89.51)	0.84(0.71,0.97)	0.05(-0.00,0.11)	0.77(0.09,1.68)	0.01(0.00,0.02)	0.09(-0.39,0.57)	48.20(15.62,99.81)	0.54(0.19,1.02)	2.49(2.06,2.93)
Bermuda	58.51(52.77,64.34)	43.60(39.36,47.61)	-0.30(-0.33,-0.27)	15.34(13.85,16.86)	11.52(10.45,12.63)	-0.31(-0.34,-0.29)	2.28(1.88,2.76)	1.43(1.19,1.73)	0.37(0.03,0.70)	32.91(27.77,39.47)	23.04(19.50,27.63)	-0.49(-0.93,-0.05)
Bhutan	60.21(51.14,69.54)	7.84(6.74,8.97)	-0.04(-0.08,-0.00)	16.06(13.54,18.59)	2.05(1.74,2.36)	-0.06(-0.10,-0.02)	2.07(0.97,3.53)	0.37(0.17,0.63)	0.02(-0.02,0.06)	52.64(27.65,87.06)	8.18(4.15,13.70)	-0.66(-0.73,-0.58)
Bolivia (Plurinational State of)	2116.89(1873.68,2370.12)	23.96(21.37,26.80)	-0.13(-0.17,-0.10)	565.50(501.04,634.36)	6.36(5.62,7.12)	-0.13(-0.17,-0.10)	47.08(29.09,67.60)	0.67(0.42,0.96)	0.52(0.46,0.57)	1013.19(654.46,1460.39)	12.09(7.79,17.06)	0.20(0.14,0.26)
Bosnia and Herzegovina	2442.68(2190.92,2764.67)	42.77(38.56,47.99)	0.15(0.08,0.21)	642.77(565.50,730.27)	11.31(10.11,12.64)	0.16(0.09,0.23)	7.80(4.37,11.59)	0.13(0.07,0.18)	-0.70(-0.86,-0.54)	248.17(173.31,329.97)	4.34(3.02,5.76)	-0.61(-0.77,-0.45)
Botswana	301.39(261.30,339.82)	17.15(15.42,18.79)	0.41(-0.26,1.09)	77.25(67.34,86.35)	4.13(3.68,4.55)	0.37(-0.33,1.06)	16.58(11.34,24.08)	1.71(1.17,2.55)	1.21(0.92,1.50)	356.50(242.65,520.29)	28.29(19.71,40.67)	0.19(-0.14,0.52)
Brazil	175678.54(158289.09,193555.53)	72.99(66.13,80.15)	2.58(2.27,2.89)	47007.25(42404.96,51753.35)	19.53(17.58,21.41)	2.69(2.36,3.01)	1935.82(1658.32,2179.01)	0.82(0.70,0.92)	0.92(0.78,1.07)	41247.14(36846.52,45950.72)	16.98(15.16,18.94)	0.83(0.68,0.98)
Brunei Darussalam	194.59(173.95,214.88)	67.20(60.75,74.90)	0.02(-0.00,0.04)	52.40(47.27,57.93)	18.13(16.38,20.08)	0.00(-0.02,0.03)	2.38(1.58,3.25)	1.43(1.01,1.93)	0.16(-0.11,0.44)	53.24(36.57,70.88)	22.08(15.99,28.70)	-0.02(-0.37,0.32)
Bulgaria	5422.99(4716.32,6395.75)	41.15(36.35,47.32)	-0.19(-0.23,-0.14)	1423.41(1230.91,1674.27)	10.85(9.62,12.40)	-0.19(-0.24,-0.15)	3.68(2.85,4.65)	0.03(0.02,0.03)	5.16(4.01,6.33)	284.85(210.45,376.41)	2.19(1.61,2.87)	0.75(0.62,0.88)
Burkina Faso	471.97(382.32,564.50)	3.44(2.97,3.99)	0.10(-0.03,0.23)	118.50(94.85,143.74)	0.79(0.66,0.92)	-0.12(-0.17,-0.06)	16.35(1.14,38.86)	0.22(0.02,0.55)	-0.02(-0.96,0.92)	444.03(51.91,1036.07)	4.28(0.43,9.82)	2.09(0.99,3.19)
Burundi	375.84(311.55,452.73)	8.32(7.02,9.83)	-1.03(-1.17,-0.88)	40.74(30.80,51.72)	0.47(0.39,0.57)	-0.25(-0.32,-0.19)	70.68(34.88,130.50)	1.75(0.87,3.23)	-0.65(-0.81,-0.50)	2181.37(1022.65,3998.26)	37.03(18.13,67.98)	-1.33(-1.49,-1.16)
Cabo Verde	20.55(17.73,23.69)	4.22(3.72,4.79)	0.41(0.35,0.46)	5.22(4.45,6.02)	1.05(0.92,1.21)	0.37(0.32,0.42)	0.41(0.17,0.70)	0.10(0.04,0.18)	5.30(4.95,5.66)	9.35(4.66,15.38)	2.19(1.02,3.62)	5.11(4.44,5.78)
Cambodia	843.56(759.16,940.86)	9.42(8.52,10.46)	0.22(0.14,0.29)	152.73(135.00,173.18)	1.40(1.27,1.57)	0.56(0.53,0.59)	164.27(100.74,227.71)	1.96(1.26,2.67)	0.06(0.02,0.11)	3672.98(2016.87,5336.44)	33.57(20.46,46.96)	-0.25(-0.31,-0.20)
Cameroon	675.06(545.64,815.60)	3.49(2.99,4.02)	0.22(0.18,0.27)	177.08(140.60,215.51)	0.87(0.74,1.00)	0.15(0.11,0.20)	2.47(0.29,5.26)	0.01(0.00,0.03)	0.44(-0.04,0.91)	147.39(43.11,295.67)	0.64(0.22,1.21)	2.83(2.35,3.32)
Canada	60754.97(53926.97,70085.41)	86.64(77.31,99.01)	-0.46(-0.53,-0.40)	16099.19(14193.69,18439.35)	23.03(20.54,26.25)	-0.47(-0.54,-0.40)	72.94(60.17,83.28)	0.09(0.07,0.10)	-3.50(-3.79,-3.21)	3428.29(2630.31,4324.67)	4.86(3.66,6.21)	-1.75(-1.88,-1.63)
Central African Republic	157.35(132.29,185.20)	7.19(6.38,8.19)	-0.29(-0.34,-0.23)	29.02(23.08,35.37)	0.86(0.74,0.98)	-0.42(-0.48,-0.35)	21.39(7.88,37.40)	1.36(0.53,2.30)	-0.04(-0.13,0.04)	660.49(230.22,1176.42)	28.05(11.08,47.77)	-0.45(-0.54,-0.36)
Chad	336.63(271.18,412.28)	3.62(3.15,4.14)	0.37(0.32,0.42)	87.77(69.59,107.66)	0.89(0.76,1.04)	0.30(0.24,0.35)	0.82(0.19,1.53)	0.01(0.00,0.02)	0.78(0.36,1.20)	51.60(21.33,89.09)	0.52(0.25,0.85)	2.50(2.13,2.87)
Chile	6463.67(5870.47,7118.32)	25.93(23.56,28.45)	1.18(0.88,1.47)	1580.66(1427.50,1734.70)	6.38(5.79,6.99)	1.10(0.81,1.39)	337.99(284.48,382.54)	1.27(1.07,1.44)	3.79(3.10,4.49)	4638.11(4080.84,5129.57)	17.75(15.65,19.60)	3.64(2.56,4.73)
China	397312.27(360058.44,444875.78)	22.69(20.68,25.15)	1.06(0.83,1.29)	102938.91(92962.79,114787.39)	5.89(5.33,6.50)	1.07(0.84,1.30)	3131.54(1562.60,4126.85)	0.21(0.11,0.27)	2.26(1.14,3.39)	61933.91(36313.26,77402.42)	3.65(2.16,4.55)	2.76(1.55,3.98)
Colombia	43064.16(39264.80,47656.08)	76.39(69.43,84.57)	-0.77(-0.83,-0.72)	11436.45(10320.28,12688.11)	20.29(18.32,22.43)	-0.80(-0.86,-0.75)	256.85(198.99,322.10)	0.44(0.35,0.56)	-3.12(-3.76,-2.47)	6059.57(4968.16,7280.04)	10.85(8.87,13.07)	-3.26(-3.95,-2.57)
Comoros	37.83(31.60,45.50)	8.74(7.39,10.32)	-0.42(-0.53,-0.32)	2.98(2.39,3.68)	0.48(0.40,0.58)	-0.24(-0.29,-0.19)	7.75(3.75,13.58)	1.86(0.96,3.20)	-0.17(-0.28,-0.06)	198.03(95.61,341.32)	38.57(19.05,66.47)	-0.70(-0.88,-0.51)
Congo	187.37(159.69,216.80)	7.37(6.58,8.36)	-0.52(-0.63,-0.42)	33.95(27.49,40.62)	0.93(0.81,1.07)	-0.36(-0.39,-0.33)	26.49(9.12,46.92)	1.38(0.52,2.38)	-0.18(-0.35,-0.02)	711.79(231.72,1249.53)	26.53(9.12,46.30)	-0.87(-1.03,-0.71)
Cook Islands	0.96(0.86,1.09)	4.14(3.72,4.67)	0.36(0.30,0.41)	0.23(0.20,0.26)	0.99(0.88,1.13)	0.28(0.23,0.32)	0.11(0.06,0.18)	0.48(0.24,0.73)	0.27(0.05,0.50)	2.01(0.95,3.36)	8.44(4.07,14.20)	0.89(0.60,1.18)
Costa Rica	4355.70(3927.90,4815.20)	78.88(71.31,87.27)	-0.33(-0.37,-0.29)	1157.86(1032.73,1287.77)	20.98(18.78,23.23)	-0.34(-0.38,-0.30)	42.49(35.27,48.44)	0.74(0.61,0.84)	-0.66(-0.87,-0.44)	852.97(740.01,966.79)	15.38(13.37,17.40)	-1.17(-1.39,-0.95)
Côte d'Ivoire	603.84(490.08,726.99)	3.55(3.07,4.05)	0.01(-0.03,0.05)	158.35(126.71,190.66)	0.88(0.76,1.02)	-0.00(-0.05,0.04)	1.90(0.30,3.84)	0.01(0.00,0.02)	3.98(3.04,4.93)	116.06(38.81,211.99)	0.56(0.21,0.94)	1.78(1.47,2.10)
Croatia	3522.16(3085.87,4072.43)	40.58(36.08,46.11)	-0.40(-0.48,-0.32)	928.98(813.03,1075.75)	10.75(9.55,12.20)	-0.40(-0.48,-0.33)	7.48(6.08,8.90)	0.08(0.06,0.09)	-2.44(-2.68,-2.20)	257.38(205.75,313.09)	2.98(2.37,3.61)	-2.49(-2.81,-2.18)
Cuba	5713.13(5102.05,6384.26)	31.40(28.18,34.88)	-1.80(-2.08,-1.52)	1492.63(1336.22,1666.80)	8.27(7.40,9.19)	-0.27(-0.55,-0.00)	82.36(68.35,94.95)	0.38(0.31,0.43)	-1.65(-1.88,-1.43)	1387.02(1189.77,1584.72)	6.91(5.94,7.90)	-2.36(-2.63,-2.08)
Cyprus	182.37(161.84,203.38)	12.13(10.87,13.46)	0.60(0.41,0.80)	33.61(29.43,38.27)	1.66(1.48,1.89)	0.61(0.42,0.80)	37.46(28.92,47.99)	2.53(1.97,3.22)	3.70(2.40,5.00)	502.49(385.09,649.27)	29.92(23.61,37.72)	4.09(3.32,4.87)
Czechia	12293.38(10797.82,13989.99)	58.25(51.91,66.12)	0.19(0.14,0.23)	3232.41(2825.51,3678.71)	15.37(13.59,17.33)	0.13(0.09,0.17)	85.56(71.24,100.93)	0.37(0.31,0.44)	0.44(-0.06,0.93)	1842.43(1554.56,2143.40)	8.83(7.47,10.25)	2.51(2.05,2.98)
Democratic People's Republic of Korea	2365.18(2107.79,2676.08)	8.43(7.57,9.49)	-0.08(-0.16,-0.00)	598.99(532.85,679.57)	2.12(1.91,2.40)	-0.10(-0.18,-0.03)	90.43(63.63,122.56)	0.37(0.26,0.50)	-0.07(-0.23,0.08)	1807.10(1318.42,2521.34)	6.42(4.76,8.76)	-0.36(-0.52,-0.19)
Democratic Republic of the Congo	2699.11(2296.29,3138.41)	7.10(6.35,8.02)	0.02(-0.03,0.07)	518.27(421.55,624.14)	0.96(0.83,1.09)	-0.43(-0.44,-0.41)	350.25(127.42,594.10)	1.31(0.48,2.23)	-0.01(-0.06,0.04)	9592.32(3490.23,16244.89)	25.66(9.43,42.89)	-0.04(-0.11,0.03)
Denmark	283.91(246.75,329.71)	2.43(2.10,2.84)	-0.67(-1.76,0.43)	73.66(63.54,86.43)	0.64(0.55,0.74)	-0.64(-1.72,0.46)	11.00(8.88,12.84)	0.08(0.06,0.09)	-1.98(-2.65,-1.30)	140.15(117.26,161.10)	1.01(0.85,1.16)	-4.13(-4.69,-3.58)
Djibouti	46.23(38.50,55.74)	9.03(7.69,10.55)	0.26(0.14,0.38)	4.74(3.69,5.89)	0.50(0.41,0.59)	-0.19(-0.24,-0.14)	8.96(4.96,14.08)	1.91(1.12,2.92)	0.56(0.45,0.67)	264.14(135.20,430.24)	38.76(22.64,60.19)	0.15(0.01,0.29)
Dominica	63.83(58.31,69.88)	84.54(77.18,92.53)	0.37(0.34,0.40)	16.65(15.06,18.11)	22.00(19.87,24.11)	0.35(0.32,0.38)	5.38(4.12,6.84)	7.39(5.63,9.41)	0.12(-0.00,0.25)	94.36(74.36,119.90)	123.55(97.00,157.42)	-0.33(-0.57,-0.10)
Dominican Republic	2926.88(2627.53,3252.34)	28.53(25.66,31.72)	-0.25(-0.34,-0.17)	776.06(697.25,858.31)	7.55(6.77,8.35)	-0.25(-0.34,-0.16)	9.08(4.25,17.75)	0.09(0.04,0.19)	-1.25(-1.52,-0.98)	298.92(198.25,461.49)	2.95(1.95,4.54)	-0.54(-0.79,-0.28)
Ecuador	4938.50(4515.19,5437.74)	30.86(28.17,34.13)	1.32(1.13,1.52)	1294.14(1170.95,1424.09)	8.05(7.27,8.87)	1.22(1.03,1.41)	104.50(82.83,131.63)	0.75(0.60,0.93)	3.77(1.94,5.62)	1764.39(1407.52,2230.13)	11.61(9.42,14.59)	4.07(2.00,6.19)
Egypt	8028.46(6876.79,9136.57)	10.93(9.60,12.31)	-0.22(-0.29,-0.15)	2067.86(1764.43,2365.77)	2.57(2.26,2.89)	-0.17(-0.24,-0.11)	390.20(305.81,475.61)	1.03(0.81,1.23)	0.25(0.06,0.45)	8952.05(6950.66,10811.93)	17.43(13.86,20.89)	-0.25(-0.38,-0.11)
El Salvador	4855.52(4378.75,5330.85)	71.67(64.68,78.92)	0.05(0.01,0.09)	1284.11(1154.72,1417.59)	18.95(17.01,20.94)	0.04(-0.00,0.09)	42.64(27.01,61.96)	0.61(0.38,0.89)	-1.40(-1.70,-1.10)	950.74(652.20,1271.47)	14.42(9.73,19.49)	-0.97(-1.38,-0.56)
Equatorial Guinea	42.95(36.04,50.47)	6.88(6.17,7.68)	0.05(-0.05,0.15)	9.16(7.33,11.01)	1.04(0.90,1.18)	0.19(0.13,0.25)	4.78(1.44,9.38)	1.25(0.44,2.48)	0.01(-0.08,0.10)	129.40(37.64,253.12)	23.56(7.34,46.96)	-0.49(-0.67,-0.30)
Eritrea	265.76(220.16,323.12)	11.89(10.10,13.99)	0.34(0.23,0.44)	22.04(16.59,27.82)	0.48(0.40,0.58)	-0.19(-0.25,-0.12)	53.35(31.85,86.90)	2.56(1.54,4.17)	0.44(0.37,0.51)	1617.15(981.58,2660.29)	52.30(31.64,83.83)	0.04(-0.05,0.12)
Estonia	622.80(549.00,723.04)	25.63(22.75,28.86)	-0.12(-0.17,-0.08)	165.55(145.85,191.44)	6.84(6.07,7.70)	-0.12(-0.16,-0.07)	4.33(3.61,5.00)	0.15(0.12,0.17)	2.96(2.12,3.80)	101.75(87.73,118.58)	4.24(3.63,4.90)	2.44(1.83,3.06)
Eswatini	137.46(118.03,155.03)	20.29(18.19,22.54)	0.46(0.10,0.83)	32.87(28.25,37.20)	4.00(3.57,4.43)	-0.03(-0.09,0.02)	10.72(6.77,16.56)	2.87(1.72,4.39)	2.13(1.64,2.62)	265.55(167.75,414.08)	51.59(32.41,79.54)	1.16(0.47,1.84)
Ethiopia	2926.51(2443.58,3508.71)	6.52(5.54,7.81)	-1.68(-1.84,-1.53)	355.40(265.41,453.71)	0.46(0.37,0.55)	-0.42(-0.53,-0.31)	527.53(317.43,775.82)	1.34(0.84,1.98)	-1.56(-1.70,-1.43)	15246.31(8636.04,23079.48)	28.40(16.97,41.59)	-2.25(-2.45,-2.05)
Fiji	34.26(30.60,38.19)	6.46(5.92,7.09)	0.30(0.10,0.50)	7.86(6.87,8.99)	1.29(1.15,1.43)	0.21(0.18,0.23)	4.48(2.29,6.70)	1.04(0.62,1.45)	0.80(0.41,1.18)	100.60(48.57,158.28)	16.70(9.50,24.09)	-0.14(-0.81,0.52)
Finland	1378.46(1208.89,1592.06)	12.50(11.01,14.26)	-0.37(-1.49,0.76)	347.99(302.56,405.14)	3.21(2.82,3.67)	-0.34(-1.43,0.75)	2.92(2.28,3.42)	0.02(0.01,0.02)	-3.52(-4.11,-2.93)	94.08(73.17,118.60)	0.77(0.58,0.97)	-2.20(-2.77,-1.63)
France	10759.22(9616.80,12092.02)	6.63(5.93,7.46)	-2.74(-2.99,-2.50)	2603.36(2295.26,2921.97)	1.66(1.48,1.87)	-1.96(-2.09,-1.83)	943.43(758.31,1071.07)	0.43(0.35,0.48)	-4.23(-4.85,-3.60)	10638.99(8894.49,11930.77)	5.63(4.83,6.26)	-5.76(-6.34,-5.18)
Gabon	70.73(61.43,80.61)	7.53(6.76,8.48)	-0.24(-0.39,-0.08)	12.57(10.39,14.78)	1.00(0.87,1.14)	-0.31(-0.34,-0.29)	10.72(3.09,19.97)	1.42(0.47,2.60)	0.33(0.13,0.54)	257.10(76.83,492.00)	26.06(7.82,48.07)	-0.51(-0.68,-0.33)
Gambia	52.34(42.66,62.52)	3.49(3.00,4.02)	0.21(0.17,0.26)	13.70(10.98,16.56)	0.87(0.74,1.01)	0.13(0.09,0.18)	0.17(0.02,0.36)	0.01(0.00,0.02)	0.70(0.14,1.25)	10.27(3.15,19.72)	0.60(0.21,1.10)	2.86(2.43,3.28)
Georgia	352.54(312.83,401.08)	5.97(5.31,6.74)	0.30(0.22,0.37)	92.63(82.10,104.55)	1.57(1.40,1.78)	0.31(0.23,0.38)	6.23(5.02,7.58)	0.10(0.08,0.12)	14.32(11.57,17.15)	129.44(108.25,154.12)	2.22(1.87,2.64)	9.16(7.43,10.91)
Germany	8775.23(7761.86,9970.92)	4.13(3.68,4.68)	1.13(0.42,1.85)	2235.23(1967.23,2533.99)	1.07(0.95,1.21)	1.12(0.41,1.83)	636.06(514.24,723.89)	0.25(0.21,0.29)	0.40(-0.16,0.96)	8430.38(7100.65,9496.02)	3.66(3.15,4.10)	1.20(0.56,1.84)
Ghana	761.50(621.33,911.56)	3.00(2.53,3.51)	-0.54(-0.60,-0.48)	199.81(160.72,241.26)	0.77(0.64,0.90)	-0.28(-0.33,-0.22)	16.81(1.37,68.65)	0.09(0.01,0.47)	-2.69(-3.23,-2.16)	708.95(79.51,1824.94)	2.77(0.37,10.19)	-0.56(-0.86,-0.25)
Greece	607.82(532.28,705.54)	2.42(2.08,2.83)	1.24(0.97,1.51)	155.38(134.53,180.14)	0.63(0.54,0.74)	1.22(0.94,1.49)	28.74(23.54,33.06)	0.08(0.07,0.09)	-1.65(-2.02,-1.27)	347.84(298.02,390.73)	1.08(0.94,1.20)	-0.89(-1.27,-0.51)
Greenland	53.41(46.54,61.68)	90.41(79.92,103.59)	-0.23(-0.30,-0.17)	14.17(12.33,16.31)	24.02(21.21,27.48)	-0.23(-0.30,-0.16)	0.03(0.01,0.06)	0.07(0.01,0.13)	-4.10(-4.93,-3.26)	2.80(1.99,3.80)	4.74(3.38,6.32)	-0.71(-0.94,-0.48)
Grenada	75.27(67.93,82.75)	78.90(71.75,86.35)	0.56(0.49,0.62)	19.74(17.92,21.64)	20.55(18.67,22.44)	0.53(0.44,0.62)	6.72(5.83,7.44)	8.14(7.05,8.96)	0.90(0.74,1.06)	116.15(101.95,129.53)	122.48(107.11,135.46)	0.04(-0.19,0.27)
Guam	10.77(9.75,11.98)	4.88(4.42,5.47)	0.20(0.09,0.31)	2.50(2.23,2.80)	1.16(1.04,1.31)	0.23(0.15,0.31)	0.55(0.19,0.83)	0.23(0.08,0.35)	-2.14(-2.84,-1.44)	9.59(3.71,14.41)	4.62(1.74,7.06)	0.21(-0.69,1.11)
Guatemala	8088.86(7240.80,8965.54)	71.03(63.58,79.42)	-1.32(-1.46,-1.18)	2143.78(1914.65,2371.41)	18.75(16.71,20.92)	-1.35(-1.50,-1.21)	47.75(40.47,56.12)	0.55(0.47,0.64)	-2.59(-3.14,-2.04)	1300.19(1098.14,1503.41)	11.95(10.21,13.79)	-4.02(-4.54,-3.51)
Guinea	288.44(235.54,345.69)	3.53(3.05,4.06)	0.23(0.19,0.27)	74.78(60.02,90.34)	0.88(0.75,1.01)	0.16(0.13,0.20)	0.72(0.14,1.35)	0.01(0.00,0.02)	-0.14(-0.61,0.33)	43.34(18.02,76.18)	0.49(0.22,0.79)	2.19(1.81,2.58)
Guinea-Bissau	41.12(33.24,50.07)	3.44(2.98,3.95)	0.17(0.12,0.22)	10.76(8.53,13.19)	0.85(0.72,0.98)	0.10(0.06,0.15)	0.14(0.04,0.26)	0.01(0.00,0.02)	-0.20(-0.74,0.35)	8.64(3.71,14.71)	0.59(0.28,0.94)	2.50(2.00,3.00)
Guyana	198.18(179.24,218.16)	34.11(30.78,37.57)	-0.22(-0.29,-0.15)	51.89(46.72,57.16)	8.87(7.95,9.82)	-0.22(-0.29,-0.15)	4.31(3.40,5.39)	0.90(0.71,1.11)	3.03(2.09,3.98)	95.49(75.60,119.50)	16.62(13.33,20.45)	1.12(-0.08,2.34)
Haiti	3358.34(3036.21,3678.18)	52.08(47.05,58.05)	-0.23(-0.27,-0.18)	874.09(792.87,955.07)	13.37(12.04,14.85)	-0.23(-0.28,-0.19)	229.67(138.91,368.08)	4.35(2.63,7.06)	-0.07(-0.14,-0.00)	6364.66(3924.67,10069.67)	85.93(52.90,134.72)	0.10(0.01,0.18)
Honduras	5203.99(4715.65,5728.04)	84.07(76.35,92.66)	0.01(-0.03,0.05)	1384.60(1255.96,1527.12)	22.25(20.01,24.66)	0.00(-0.04,0.04)	43.04(30.49,57.18)	0.86(0.62,1.14)	0.92(0.75,1.09)	1152.11(849.06,1488.74)	18.81(14.08,23.83)	0.36(0.21,0.52)
Hungary	8358.54(7334.14,9551.42)	42.99(38.07,48.46)	-0.06(-0.12,0.01)	2206.03(1937.60,2513.45)	11.37(10.10,12.84)	-0.05(-0.12,0.01)	31.77(26.61,37.10)	0.15(0.13,0.17)	4.00(2.56,5.47)	861.59(719.61,1004.61)	4.54(3.77,5.28)	3.17(2.63,3.72)
Iceland	8.88(7.47,10.70)	1.57(1.31,1.92)	0.17(-0.29,0.63)	2.37(1.97,2.86)	0.42(0.35,0.51)	0.21(-0.26,0.68)	0.14(0.11,0.17)	0.02(0.01,0.02)	-2.77(-3.38,-2.15)	1.96(1.61,2.27)	0.29(0.25,0.34)	-3.74(-4.09,-3.39)
India	180832.02(154974.77,205813.70)	12.89(11.18,14.55)	1.39(1.09,1.69)	47586.21(40840.97,54289.30)	3.33(2.89,3.78)	1.50(1.19,1.80)	5441.37(2999.48,7232.32)	0.52(0.28,0.69)	-1.51(-2.36,-0.65)	146565.01(90926.90,191409.94)	11.95(7.19,15.59)	-1.48(-2.86,-0.08)
Indonesia	9160.76(7954.60,10715.14)	4.76(4.24,5.47)	0.50(0.37,0.63)	1718.71(1435.62,2034.56)	0.72(0.63,0.84)	-0.42(-0.53,-0.30)	1083.26(534.41,1467.87)	0.70(0.37,0.97)	1.76(1.56,1.95)	24497.57(11178.18,35082.16)	11.97(5.95,16.28)	0.95(0.59,1.32)
Iran (Islamic Republic of)	7802.38(6846.98,8769.22)	9.54(8.49,10.62)	-0.18(-0.47,0.11)	1991.57(1727.34,2263.37)	2.36(2.09,2.63)	-0.08(-0.42,0.26)	441.28(335.12,507.67)	0.70(0.54,0.80)	-0.30(-0.44,-0.17)	8095.40(5972.38,9326.03)	11.41(8.65,13.12)	-0.48(-0.69,-0.26)
Iraq	3050.11(2604.36,3474.54)	9.52(8.29,10.72)	-0.22(-0.29,-0.15)	818.07(692.30,934.54)	2.52(2.20,2.84)	-0.20(-0.27,-0.13)	29.38(17.50,41.65)	0.20(0.13,0.28)	-0.71(-1.04,-0.38)	698.91(442.83,938.74)	3.36(2.19,4.58)	-1.27(-1.73,-0.82)
Ireland	339.31(297.54,388.63)	4.48(3.92,5.15)	-2.45(-2.65,-2.26)	86.86(75.94,99.72)	1.16(1.01,1.34)	-2.33(-2.51,-2.14)	18.93(14.64,22.21)	0.22(0.17,0.25)	-3.07(-3.75,-2.38)	240.55(195.99,279.41)	2.83(2.32,3.28)	-5.48(-5.98,-4.97)
Israel	2765.09(2499.44,3033.95)	20.03(18.21,21.98)	0.84(0.29,1.40)	567.51(509.21,625.65)	4.30(3.87,4.74)	0.69(0.54,0.84)	470.17(377.31,529.67)	3.23(2.62,3.62)	1.00(0.55,1.46)	5983.13(5004.94,6647.48)	43.52(36.86,48.26)	0.11(-0.54,0.76)
Italy	43347.07(39012.23,48211.34)	28.39(25.99,31.34)	1.20(0.60,1.80)	11107.35(9985.34,12361.99)	7.36(6.65,8.11)	1.20(0.60,1.80)	609.28(480.16,680.14)	0.28(0.23,0.31)	1.09(0.64,1.54)	8446.76(7152.61,9387.34)	4.64(4.00,5.19)	-0.03(-0.37,0.32)
Jamaica	2181.92(2003.63,2376.05)	65.50(60.00,71.79)	0.11(0.04,0.18)	574.91(526.45,622.80)	17.32(15.83,18.82)	0.11(0.04,0.18)	160.83(126.22,194.82)	4.57(3.62,5.57)	0.09(-0.11,0.30)	2606.15(2070.62,3196.68)	79.99(63.57,98.29)	-0.07(-0.39,0.25)
Japan	152659.93(136823.98,173018.11)	47.99(43.17,53.04)	0.26(0.15,0.37)	40927.18(36293.82,46349.71)	13.03(11.68,14.33)	0.27(0.15,0.38)	663.44(517.17,751.36)	0.11(0.09,0.12)	-4.12(-5.08,-3.15)	13636.04(11482.58,15939.35)	3.53(2.83,4.26)	-0.55(-0.99,-0.11)
Jordan	597.66(525.87,675.73)	8.82(8.01,9.78)	0.68(0.57,0.80)	156.80(136.99,177.03)	2.17(1.95,2.41)	0.69(0.58,0.79)	45.49(35.66,56.83)	1.01(0.79,1.26)	0.20(0.05,0.35)	898.74(687.90,1116.71)	15.18(12.05,18.82)	-0.37(-0.53,-0.22)
Kazakhstan	677.64(588.78,782.33)	4.58(4.04,5.26)	0.09(0.06,0.12)	179.01(155.01,208.57)	1.22(1.06,1.39)	0.11(0.08,0.14)	4.48(3.46,5.58)	0.03(0.03,0.04)	1.62(1.25,2.00)	129.94(103.66,161.23)	0.80(0.65,0.98)	0.82(0.34,1.30)
Kenya	1908.44(1584.11,2325.01)	9.72(8.16,11.78)	0.72(0.67,0.78)	176.19(134.21,222.23)	0.47(0.39,0.57)	-1.84(-2.45,-1.22)	368.57(222.62,631.25)	2.06(1.29,3.57)	0.74(0.65,0.83)	10151.68(5812.27,17000.33)	41.00(24.98,70.01)	0.84(0.74,0.93)
Kiribati	12.93(11.69,14.33)	24.08(21.84,26.49)	0.35(0.25,0.46)	1.25(1.10,1.40)	2.00(1.81,2.22)	0.53(0.45,0.61)	2.76(1.29,5.13)	5.26(2.65,9.36)	0.52(0.44,0.59)	79.33(36.08,153.25)	108.65(52.70,206.23)	0.08(-0.03,0.19)
Kuwait	448.55(382.14,518.52)	10.06(8.81,11.36)	-0.25(-0.32,-0.17)	121.66(103.10,141.55)	2.67(2.33,3.01)	-0.29(-0.38,-0.21)	5.54(4.17,6.95)	0.27(0.20,0.34)	1.32(-0.03,2.70)	102.08(82.86,124.81)	4.06(3.21,5.01)	2.81(1.23,4.42)
Kyrgyzstan	193.56(166.40,225.66)	4.31(3.76,4.99)	-0.07(-0.11,-0.02)	50.97(43.93,59.89)	1.13(0.99,1.32)	-0.08(-0.12,-0.03)	0.23(0.16,0.31)	0.01(0.00,0.01)	8.47(6.33,10.66)	15.18(11.58,19.56)	0.32(0.24,0.41)	1.37(0.98,1.77)
Lao People's Democratic Republic	316.28(283.98,353.71)	8.78(7.96,9.81)	-0.27(-0.31,-0.23)	58.92(52.00,66.92)	1.38(1.23,1.54)	0.18(0.15,0.20)	62.96(34.84,94.08)	1.86(1.10,2.74)	-0.25(-0.28,-0.23)	1550.62(741.71,2515.32)	34.18(18.45,52.13)	-0.41(-0.44,-0.39)
Latvia	1196.43(1059.36,1345.76)	32.04(28.80,35.64)	0.31(-0.15,0.78)	315.22(278.94,353.63)	8.47(7.56,9.37)	0.31(-0.13,0.75)	24.48(20.98,27.88)	0.59(0.51,0.68)	4.01(3.31,4.72)	517.64(449.46,592.01)	15.11(13.09,17.41)	4.28(3.65,4.92)
Lebanon	800.81(709.00,890.25)	12.53(11.11,13.97)	-0.37(-0.48,-0.26)	156.47(137.60,175.15)	2.55(2.25,2.86)	-0.20(-0.24,-0.16)	94.46(66.86,125.97)	1.38(0.98,1.82)	-0.48(-0.69,-0.26)	1285.67(938.77,1657.80)	19.58(14.38,24.96)	-1.50(-1.76,-1.25)
Lesotho	232.84(202.51,261.74)	18.81(17.06,20.92)	0.84(0.61,1.07)	55.26(47.70,62.47)	3.88(3.46,4.34)	0.04(-0.04,0.11)	19.07(12.16,26.90)	2.51(1.55,3.56)	3.28(2.88,3.69)	438.20(279.49,631.07)	44.99(29.13,63.62)	2.77(2.15,3.39)
Liberia	118.01(95.36,143.02)	3.42(2.95,3.94)	0.12(0.06,0.17)	30.97(24.63,37.90)	0.85(0.72,0.99)	0.06(0.01,0.12)	0.42(0.04,1.01)	0.01(0.00,0.03)	0.42(-0.12,0.97)	25.54(7.01,55.71)	0.59(0.20,1.19)	2.95(2.41,3.49)
Libya	657.26(565.22,742.04)	10.54(9.24,11.81)	0.08(-0.01,0.17)	169.36(145.03,193.67)	2.58(2.25,2.90)	-0.29(-0.34,-0.24)	36.59(22.88,52.03)	0.91(0.56,1.29)	1.27(0.98,1.55)	761.96(487.89,1069.91)	15.58(9.93,21.88)	1.32(1.03,1.62)
Lithuania	1076.30(949.64,1240.23)	20.40(18.21,23.05)	-0.17(-0.41,0.08)	288.74(254.67,331.30)	5.49(4.89,6.23)	-0.16(-0.40,0.08)	9.59(8.05,11.27)	0.16(0.14,0.19)	4.16(3.35,4.99)	227.20(196.55,265.11)	4.57(3.92,5.35)	3.54(2.98,4.12)
Luxembourg	48.51(43.21,55.17)	4.48(3.97,5.09)	-0.69(-1.34,-0.03)	12.39(10.89,14.10)	1.16(1.01,1.32)	-0.64(-1.28,-0.01)	3.02(2.51,3.45)	0.23(0.19,0.26)	-1.51(-1.91,-1.11)	35.86(30.66,40.80)	2.90(2.51,3.28)	-3.01(-3.39,-2.62)
Madagascar	778.15(636.02,943.69)	7.56(6.41,8.98)	-0.25(-0.31,-0.19)	91.89(67.91,118.59)	0.47(0.39,0.57)	-0.24(-0.30,-0.19)	145.05(71.83,300.96)	1.59(0.80,3.26)	-0.28(-0.35,-0.20)	4764.14(2366.08,9281.82)	34.53(17.31,71.84)	-0.32(-0.40,-0.25)
Malawi	660.22(553.30,789.61)	9.71(8.19,11.55)	-0.18(-0.46,0.09)	61.55(46.76,78.18)	0.46(0.39,0.56)	-0.23(-0.29,-0.16)	130.41(80.40,192.82)	2.09(1.33,3.09)	0.18(-0.01,0.38)	3903.29(2270.42,5859.56)	43.69(26.81,63.92)	-0.45(-0.77,-0.13)
Malaysia	5953.29(5414.92,6472.57)	25.95(23.91,28.32)	3.32(2.84,3.81)	867.00(783.20,946.41)	3.34(3.03,3.66)	2.27(2.07,2.48)	1274.12(895.17,1639.51)	5.62(3.96,7.23)	2.09(1.60,2.57)	25344.12(17724.93,32551.56)	96.95(67.07,123.65)	2.77(2.14,3.41)
Maldives	26.94(24.12,29.97)	8.40(7.67,9.16)	-1.12(-1.39,-0.86)	6.17(5.52,6.93)	1.80(1.62,1.97)	0.12(0.01,0.24)	3.06(1.90,4.30)	1.16(0.74,1.62)	-2.76(-3.04,-2.47)	57.44(34.29,81.37)	17.95(11.22,24.97)	-3.94(-4.46,-3.42)
Mali	471.55(379.63,582.40)	3.48(2.98,4.01)	0.21(0.15,0.26)	123.66(97.95,153.93)	0.87(0.73,1.01)	0.16(0.11,0.21)	1.16(0.19,2.42)	0.01(0.00,0.02)	0.08(-0.43,0.59)	73.30(28.48,139.07)	0.52(0.21,0.93)	2.37(1.90,2.84)
Malta	204.72(185.86,225.24)	18.26(16.61,20.06)	-0.27(-0.67,0.14)	39.92(36.07,44.26)	3.73(3.37,4.12)	0.01(-0.27,0.29)	38.75(31.14,43.98)	3.28(2.67,3.72)	0.42(-0.04,0.89)	503.76(419.18,564.74)	46.08(39.04,51.56)	-1.00(-1.51,-0.49)
Marshall Islands	2.06(1.80,2.37)	7.43(6.76,8.23)	0.44(0.32,0.57)	0.37(0.32,0.43)	1.22(1.10,1.36)	0.17(0.13,0.20)	0.39(0.18,0.61)	1.51(0.81,2.28)	0.82(0.70,0.94)	12.24(5.61,19.30)	32.74(16.13,50.11)	0.72(0.55,0.90)
Mauritania	97.90(80.80,117.99)	3.29(2.85,3.80)	0.04(-0.00,0.09)	25.72(21.01,31.09)	0.84(0.71,0.97)	0.01(-0.04,0.05)	0.27(0.03,0.56)	0.01(0.00,0.02)	0.40(-0.15,0.95)	14.92(5.58,28.74)	0.49(0.19,0.94)	2.17(1.75,2.60)
Mauritius	154.28(139.71,170.18)	9.54(8.66,10.52)	2.70(2.50,2.90)	27.16(24.39,29.89)	1.64(1.48,1.81)	1.58(1.50,1.66)	30.65(27.18,32.91)	1.87(1.65,2.02)	4.11(3.64,4.58)	546.96(499.10,581.73)	32.16(29.29,34.16)	4.67(4.15,5.19)
Mexico	107104.37(96878.59,117792.83)	89.99(81.51,99.35)	-0.05(-0.13,0.03)	28700.13(25783.15,31758.85)	24.09(21.62,26.72)	-0.06(-0.14,0.01)	694.84(555.63,902.87)	0.63(0.51,0.82)	-2.67(-2.97,-2.36)	16520.37(13265.50,20650.27)	13.84(11.21,17.23)	-2.70(-3.06,-2.34)
Micronesia (Federated States of)	4.55(3.98,5.19)	8.08(7.26,9.02)	0.56(0.52,0.61)	0.77(0.66,0.89)	1.27(1.14,1.43)	0.38(0.35,0.41)	0.88(0.40,1.40)	1.66(0.83,2.51)	0.59(0.56,0.62)	24.53(10.09,41.39)	34.25(15.68,54.43)	0.51(0.45,0.58)
Monaco	4.36(3.81,5.02)	4.61(4.05,5.33)	-0.29(-0.35,-0.23)	1.12(0.97,1.29)	1.21(1.06,1.40)	-0.28(-0.35,-0.22)	0.23(0.15,0.31)	0.18(0.12,0.24)	-0.42(-0.61,-0.23)	3.05(2.17,4.12)	2.74(1.93,3.70)	-0.73(-1.11,-0.34)
Mongolia	89.25(76.64,104.33)	4.51(3.96,5.19)	0.00(-0.02,0.03)	23.43(20.09,27.45)	1.19(1.04,1.37)	0.02(-0.00,0.05)	0.92(0.18,2.58)	0.05(0.01,0.15)	0.68(-0.08,1.44)	27.46(8.27,69.13)	1.21(0.37,3.00)	0.16(-0.73,1.06)
Montenegro	352.60(307.92,412.28)	41.55(36.64,47.76)	-0.22(-0.28,-0.17)	92.84(80.99,107.19)	10.99(9.62,12.52)	-0.23(-0.28,-0.17)	0.01(0.00,0.01)	0.00(0.00,0.00)	0.87(0.41,1.34)	14.83(9.96,20.74)	1.74(1.19,2.42)	-0.21(-0.26,-0.16)
Morocco	3604.76(3143.47,4054.26)	10.71(9.43,12.00)	0.18(0.15,0.20)	910.81(794.41,1034.02)	2.57(2.27,2.89)	-0.14(-0.18,-0.09)	268.95(193.58,368.68)	1.02(0.74,1.41)	1.75(1.56,1.94)	5246.77(3687.84,6983.06)	17.09(12.19,22.70)	1.74(1.61,1.88)
Mozambique	371.64(288.37,470.22)	2.16(1.83,2.56)	0.08(-0.05,0.21)	92.25(68.15,119.22)	0.47(0.38,0.56)	-0.16(-0.23,-0.09)	28.62(13.93,49.37)	0.28(0.15,0.47)	0.10(-0.51,0.71)	961.43(431.17,1649.74)	6.62(3.31,11.24)	1.28(0.23,2.34)
Myanmar	3274.86(2952.37,3631.04)	8.36(7.56,9.30)	-0.15(-0.23,-0.07)	632.92(566.72,709.33)	1.46(1.32,1.63)	0.36(0.34,0.38)	628.13(396.11,857.02)	1.69(1.08,2.29)	-0.22(-0.28,-0.15)	13177.78(7704.06,18331.52)	29.75(17.98,40.65)	-0.64(-0.75,-0.53)
Namibia	296.90(259.27,333.07)	17.87(16.15,19.66)	0.00(-0.13,0.13)	75.40(65.80,84.36)	4.15(3.72,4.58)	-0.16(-0.20,-0.12)	19.33(13.24,27.17)	2.04(1.38,2.92)	1.54(1.17,1.91)	418.21(281.59,591.75)	34.45(23.63,49.00)	0.49(0.05,0.93)
Nauru	0.46(0.40,0.52)	9.53(8.61,10.63)	0.92(0.80,1.04)	0.07(0.06,0.08)	1.26(1.13,1.41)	0.37(0.35,0.39)	0.09(0.04,0.14)	1.99(1.07,3.09)	1.04(0.96,1.12)	2.63(1.27,4.33)	42.39(21.23,66.80)	0.83(0.65,1.01)
Nepal	2416.39(2065.16,2766.11)	8.34(7.18,9.41)	0.96(0.60,1.33)	643.33(546.92,739.12)	2.21(1.90,2.50)	0.92(0.57,1.27)	8.84(6.00,13.07)	0.04(0.03,0.05)	1.02(0.59,1.44)	530.18(368.39,739.10)	1.71(1.24,2.33)	3.02(2.42,3.62)
Netherlands	2411.62(2168.52,2697.21)	6.69(6.01,7.49)	-2.34(-2.49,-2.19)	579.28(510.50,651.68)	1.64(1.46,1.85)	-1.88(-1.99,-1.78)	248.98(197.94,286.45)	0.60(0.48,0.69)	-2.66(-3.22,-2.10)	2963.01(2465.60,3363.96)	7.43(6.22,8.42)	-4.51(-4.89,-4.14)
New Zealand	2221.26(1999.95,2513.61)	29.67(26.69,33.19)	0.10(-0.25,0.46)	580.49(521.37,655.09)	7.78(7.01,8.75)	0.11(-0.25,0.47)	8.95(6.87,10.52)	0.09(0.07,0.11)	-3.58(-4.54,-2.60)	197.86(161.94,236.37)	2.38(1.90,2.89)	-2.16(-2.89,-1.43)
Nicaragua	3719.80(3363.45,4088.66)	73.72(66.80,80.92)	0.06(0.01,0.10)	990.25(895.11,1091.78)	19.54(17.48,21.54)	0.04(-0.01,0.09)	18.39(11.72,24.82)	0.45(0.30,0.62)	-1.02(-1.19,-0.84)	526.82(374.36,668.60)	10.82(7.83,13.62)	-0.93(-1.10,-0.75)
Niger	461.45(369.04,569.85)	3.47(3.01,3.97)	0.22(0.16,0.29)	120.72(94.58,149.36)	0.86(0.73,0.99)	0.14(0.08,0.20)	0.94(0.14,2.14)	0.01(0.00,0.02)	0.29(-0.18,0.76)	63.05(26.15,124.41)	0.46(0.19,0.88)	2.03(1.66,2.40)
Nigeria	4824.73(3920.46,5808.32)	3.48(3.00,3.98)	0.25(0.16,0.34)	1269.65(1022.48,1535.38)	0.87(0.74,1.00)	0.14(0.06,0.23)	10.37(2.49,17.98)	0.01(0.00,0.02)	0.43(0.05,0.81)	678.11(322.35,1079.35)	0.46(0.22,0.70)	2.06(1.71,2.42)
Niue	0.14(0.13,0.16)	7.49(6.76,8.36)	0.38(0.33,0.42)	0.02(0.02,0.03)	1.17(1.05,1.32)	-0.01(-0.03,0.01)	0.03(0.02,0.04)	1.54(0.86,2.21)	0.70(0.61,0.78)	0.59(0.29,0.89)	29.68(14.68,44.98)	0.40(0.33,0.47)
North Macedonia	1103.16(956.26,1294.21)	41.50(36.68,47.53)	-0.14(-0.19,-0.09)	290.04(252.49,339.73)	10.96(9.68,12.58)	-0.15(-0.20,-0.09)	0.01(0.00,0.01)	0.00(0.00,0.00)	4.21(3.72,4.71)	47.11(31.80,65.47)	1.74(1.19,2.36)	-0.13(-0.18,-0.07)
Northern Mariana Islands	2.42(2.17,2.72)	7.58(6.86,8.49)	-1.17(-1.59,-0.75)	0.52(0.45,0.59)	1.34(1.20,1.50)	-0.42(-0.53,-0.31)	0.29(0.14,0.48)	1.17(0.55,1.90)	-3.07(-3.73,-2.41)	5.73(3.01,10.23)	16.99(8.24,27.14)	-3.35(-4.56,-2.12)
Norway	2522.05(2272.96,2828.79)	31.68(28.33,35.48)	1.11(0.17,2.05)	646.11(579.41,720.94)	8.20(7.30,9.14)	1.13(0.19,2.09)	21.10(17.28,23.72)	0.16(0.13,0.18)	-0.74(-1.10,-0.39)	342.03(291.11,394.59)	3.26(2.74,3.84)	-0.85(-1.41,-0.29)
Oman	478.90(408.61,556.22)	16.92(15.17,18.91)	0.68(0.27,1.08)	117.21(98.89,136.70)	3.09(2.76,3.45)	0.15(0.11,0.20)	30.04(18.56,40.57)	2.43(1.59,3.38)	0.50(-0.03,1.03)	739.94(414.77,1023.29)	40.16(25.70,54.16)	0.70(-0.16,1.58)
Pakistan	14664.66(12385.57,17029.43)	7.27(6.23,8.30)	-0.26(-0.34,-0.19)	3934.98(3289.79,4559.95)	1.92(1.64,2.21)	-0.27(-0.35,-0.19)	188.90(63.90,354.07)	0.16(0.05,0.31)	-0.06(-0.21,0.08)	7595.62(3663.98,12686.25)	4.44(1.78,7.89)	-0.71(-0.85,-0.57)
Palau	0.60(0.50,0.72)	3.15(2.70,3.67)	-0.46(-0.56,-0.35)	0.15(0.12,0.18)	0.78(0.67,0.92)	-0.41(-0.50,-0.31)	0.01(0.00,0.01)	0.04(0.01,0.11)	-1.89(-2.63,-1.15)	0.13(0.05,0.29)	0.82(0.30,1.94)	-2.23(-3.08,-1.37)
Palestine	356.70(304.51,406.85)	10.30(9.11,11.56)	-0.04(-0.07,-0.01)	93.14(79.17,106.72)	2.46(2.16,2.76)	-0.12(-0.18,-0.06)	12.20(8.17,15.05)	0.77(0.53,0.97)	-0.39(-0.61,-0.16)	249.29(160.09,311.46)	11.86(8.02,14.52)	-0.29(-0.69,0.11)
Panama	4223.44(3810.37,4644.97)	92.44(83.17,101.50)	0.23(0.20,0.25)	1128.82(1019.99,1240.36)	24.70(22.18,27.15)	0.23(0.21,0.26)	55.09(41.66,66.23)	1.17(0.89,1.41)	0.94(0.78,1.11)	1065.75(860.54,1251.98)	23.50(18.95,27.64)	0.18(-0.02,0.39)
Papua New Guinea	240.95(207.20,279.97)	5.20(4.64,5.84)	0.20(0.16,0.24)	51.88(43.85,60.66)	1.01(0.90,1.14)	0.10(0.07,0.14)	40.48(11.77,94.19)	1.01(0.33,2.33)	0.04(-0.04,0.12)	1235.84(342.00,2957.89)	21.85(6.70,50.70)	0.25(0.20,0.30)
Paraguay	2601.04(2338.13,2875.79)	42.75(38.60,47.29)	0.35(0.31,0.39)	695.87(625.70,776.24)	11.40(10.24,12.69)	0.33(0.29,0.37)	28.38(16.75,41.58)	0.53(0.32,0.79)	0.35(0.05,0.65)	624.12(397.98,866.90)	10.81(6.92,15.04)	0.76(0.51,1.01)
Peru	8285.05(7413.99,9304.07)	23.42(20.93,26.38)	-1.36(-1.47,-1.25)	2211.44(1967.90,2468.78)	6.24(5.55,6.98)	-1.38(-1.49,-1.27)	101.80(51.28,174.81)	0.30(0.15,0.52)	-3.88(-4.53,-3.23)	1977.32(1235.86,2999.95)	5.78(3.59,8.88)	-5.10(-5.88,-4.30)
Philippines	10184.71(9346.94,11057.10)	14.89(13.79,16.07)	0.38(0.28,0.48)	2137.87(1926.70,2343.70)	2.80(2.55,3.07)	0.51(0.34,0.68)	1432.85(1109.55,1748.29)	2.45(1.88,3.00)	-0.14(-0.25,-0.02)	29004.96(21262.82,35757.62)	40.07(30.50,48.60)	-0.22(-0.30,-0.14)
Poland	46162.04(41922.97,50863.38)	64.14(59.11,70.15)	0.88(0.81,0.96)	12117.22(11067.42,13419.95)	16.89(15.53,18.55)	0.86(0.79,0.94)	0.06(0.06,0.07)	0.00(0.00,0.00)	-16.54(-18.02,-15.03)	1817.22(1293.07,2429.11)	2.59(1.84,3.44)	-0.09(-0.40,0.22)
Portugal	560.81(483.29,650.34)	2.12(1.83,2.47)	-2.74(-3.41,-2.07)	131.23(113.45,154.25)	0.52(0.44,0.60)	-2.43(-2.98,-1.87)	73.70(60.15,84.60)	0.22(0.18,0.25)	-1.73(-2.90,-0.55)	870.75(737.64,984.43)	2.82(2.44,3.16)	-4.86(-6.10,-3.60)
Puerto Rico	2766.97(2498.95,3076.37)	36.50(33.12,40.09)	-1.20(-1.26,-1.14)	723.27(648.69,800.84)	9.63(8.70,10.62)	-1.22(-1.28,-1.15)	73.95(59.64,87.95)	0.77(0.62,0.91)	-2.77(-3.17,-2.37)	1095.50(913.57,1280.17)	13.83(11.56,16.09)	-3.48(-3.89,-3.07)
Qatar	886.61(746.02,1045.84)	30.89(27.17,34.29)	-0.51(-0.81,-0.20)	234.62(198.73,272.15)	7.74(6.83,8.70)	-0.44(-0.75,-0.12)	3.99(1.77,6.50)	1.40(0.65,2.16)	-1.21(-1.65,-0.76)	128.54(77.46,190.69)	19.60(9.68,30.39)	-0.57(-1.25,0.12)
Republic of Korea	39844.41(35691.95,44354.28)	51.28(46.41,57.08)	-0.29(-0.40,-0.19)	10650.54(9463.27,11895.69)	13.77(12.38,15.28)	-0.30(-0.40,-0.19)	433.66(319.11,549.85)	0.49(0.36,0.62)	-2.23(-2.43,-2.04)	7325.70(5683.75,9007.59)	8.53(6.72,10.41)	-2.22(-2.47,-1.98)
Republic of Moldova	1361.55(1201.45,1555.95)	25.47(22.56,28.85)	-0.10(-0.14,-0.06)	359.54(318.08,411.31)	6.74(5.96,7.60)	-0.10(-0.14,-0.06)	0.64(0.54,0.79)	0.01(0.01,0.01)	4.10(3.28,4.91)	74.61(54.74,98.11)	1.40(1.03,1.84)	0.52(0.42,0.61)
Romania	15308.97(13406.70,17502.73)	41.65(37.25,47.18)	-0.11(-0.26,0.05)	4010.97(3481.73,4601.96)	10.96(9.78,12.40)	-0.11(-0.27,0.04)	42.70(37.38,49.17)	0.11(0.09,0.12)	4.14(3.14,5.16)	1377.14(1157.30,1592.15)	3.89(3.27,4.54)	2.36(2.02,2.70)
Russian Federation	46832.05(41835.50,53003.05)	22.50(20.02,25.24)	-0.43(-0.51,-0.34)	12497.71(11045.86,14165.42)	6.02(5.37,6.73)	-0.42(-0.51,-0.34)	345.60(314.75,374.59)	0.15(0.14,0.16)	5.56(4.70,6.43)	9219.56(8436.76,10216.97)	4.34(3.97,4.80)	3.30(2.72,3.89)
Rwanda	439.12(365.40,527.09)	8.03(6.78,9.38)	-1.41(-1.67,-1.15)	45.91(35.03,57.62)	0.47(0.39,0.57)	-0.21(-0.26,-0.17)	83.39(36.74,151.55)	1.69(0.78,2.98)	-0.83(-1.10,-0.57)	2343.48(1016.68,4407.91)	34.16(15.49,61.78)	-2.04(-2.36,-1.73)
Saint Kitts and Nevis	41.91(37.90,45.60)	76.12(69.17,83.56)	0.03(-0.06,0.12)	11.02(9.99,12.01)	19.88(17.88,21.76)	0.02(-0.06,0.11)	2.83(2.40,3.25)	6.10(5.26,6.82)	-0.27(-0.51,-0.03)	52.12(43.35,60.94)	95.14(81.34,109.69)	-1.22(-1.47,-0.97)
Saint Lucia	144.84(131.07,158.39)	64.29(58.28,70.09)	-0.23(-0.34,-0.11)	37.79(34.19,41.43)	16.75(15.22,18.29)	-0.20(-0.29,-0.11)	11.25(9.36,13.20)	5.08(4.22,5.97)	0.37(-0.13,0.88)	176.26(148.21,206.83)	78.15(65.82,91.66)	-0.86(-1.42,-0.30)
Saint Vincent and the Grenadines	90.05(81.15,99.25)	69.25(62.75,75.93)	0.74(0.65,0.84)	23.67(21.42,25.98)	18.12(16.36,19.85)	0.74(0.65,0.83)	7.44(6.53,8.53)	6.14(5.38,7.04)	4.59(3.68,5.50)	137.69(121.62,155.93)	106.23(93.62,120.25)	2.92(1.55,4.32)
Samoa	8.86(7.89,9.94)	7.02(6.30,7.85)	0.38(0.34,0.43)	1.66(1.46,1.89)	1.22(1.09,1.37)	0.16(0.14,0.19)	1.68(0.88,2.53)	1.41(0.81,2.06)	0.62(0.49,0.74)	40.19(17.60,62.75)	28.34(13.69,43.19)	0.54(0.46,0.62)
San Marino	3.25(2.84,3.76)	4.46(3.88,5.21)	-0.26(-0.36,-0.16)	0.84(0.73,0.98)	1.17(1.01,1.36)	-0.25(-0.34,-0.15)	0.05(0.03,0.08)	0.04(0.02,0.06)	-2.17(-2.41,-1.92)	0.72(0.45,1.03)	0.77(0.50,1.08)	-1.77(-2.10,-1.44)
Sao Tome and Principe	5.27(4.37,6.29)	3.49(3.03,4.00)	0.34(0.30,0.39)	1.39(1.12,1.66)	0.88(0.75,1.02)	0.26(0.22,0.30)	0.00(0.00,0.00)	0.00(0.00,0.00)	2.20(1.94,2.46)	0.27(0.18,0.38)	0.19(0.13,0.24)	0.52(0.45,0.58)
Saudi Arabia	5226.74(4658.11,5775.60)	30.55(27.91,33.52)	0.37(0.21,0.53)	1339.81(1175.50,1483.91)	6.80(6.20,7.49)	0.38(0.25,0.51)	586.72(465.42,724.32)	5.25(4.33,6.52)	0.74(0.59,0.89)	16617.96(12971.66,21101.61)	89.30(72.92,109.70)	0.29(0.12,0.45)
Senegal	375.57(311.01,446.55)	3.64(3.17,4.18)	0.28(0.23,0.33)	97.78(79.81,117.99)	0.91(0.78,1.05)	0.21(0.17,0.26)	1.03(0.15,1.96)	0.01(0.00,0.02)	0.28(-0.22,0.79)	59.83(23.33,107.21)	0.54(0.22,0.91)	2.40(1.95,2.84)
Serbia	5096.56(4472.46,5761.27)	31.79(28.05,36.04)	0.36(0.33,0.39)	1391.63(1222.53,1569.89)	8.71(7.67,9.78)	0.39(0.36,0.43)	28.27(12.20,42.88)	0.17(0.07,0.25)	0.80(0.41,1.20)	696.25(408.72,935.08)	4.36(2.57,5.79)	1.25(0.88,1.63)
Seychelles	6.45(5.85,7.17)	6.36(5.79,7.02)	0.96(0.86,1.06)	1.47(1.32,1.65)	1.40(1.26,1.57)	0.72(0.65,0.79)	0.82(0.47,1.06)	0.88(0.52,1.15)	0.67(0.47,0.86)	14.56(7.68,19.18)	14.12(7.76,18.41)	0.26(-0.12,0.63)
Sierra Leone	194.34(157.71,232.25)	3.41(2.93,3.92)	0.15(0.10,0.21)	50.70(40.74,61.32)	0.85(0.72,0.99)	0.09(0.04,0.14)	0.45(0.11,0.93)	0.01(0.00,0.02)	-0.42(-0.89,0.05)	28.41(12.51,52.35)	0.46(0.22,0.80)	1.94(1.57,2.31)
Singapore	3744.93(3376.52,4164.71)	49.87(44.94,55.08)	-0.45(-0.60,-0.30)	1007.68(903.22,1118.45)	13.43(12.07,14.82)	-0.46(-0.61,-0.31)	60.38(48.28,69.41)	0.74(0.59,0.85)	-3.23(-3.76,-2.70)	919.46(790.12,1061.40)	11.48(9.94,13.19)	-1.99(-2.31,-1.66)
Slovakia	4662.26(4124.11,5280.60)	53.53(47.54,60.29)	0.14(-0.05,0.33)	1225.71(1074.96,1387.83)	14.12(12.47,15.88)	0.16(-0.03,0.34)	20.43(11.98,27.85)	0.22(0.13,0.30)	1.32(0.76,1.89)	582.79(396.77,751.44)	6.69(4.49,8.58)	1.64(1.42,1.88)
Slovenia	2169.88(1901.69,2490.57)	45.30(40.40,51.43)	0.11(-0.13,0.35)	576.74(496.79,659.36)	12.04(10.63,13.72)	0.11(-0.14,0.36)	12.49(10.52,14.25)	0.24(0.21,0.28)	3.36(2.51,4.21)	277.08(240.23,319.01)	6.19(5.38,7.13)	3.08(2.60,3.56)
Solomon Islands	21.88(19.05,25.11)	6.83(6.15,7.73)	0.56(0.52,0.61)	3.77(3.22,4.40)	1.08(0.97,1.22)	0.32(0.31,0.33)	3.98(1.34,7.35)	1.38(0.52,2.64)	0.58(0.55,0.61)	122.58(36.91,229.91)	31.03(10.41,57.20)	0.73(0.68,0.78)
Somalia	584.44(476.07,706.42)	10.11(8.41,12.14)	-0.09(-0.18,0.01)	59.86(44.03,78.49)	0.46(0.38,0.55)	-0.25(-0.31,-0.18)	112.60(58.85,216.13)	2.17(1.12,4.57)	0.05(-0.02,0.12)	3906.12(1932.52,7370.91)	48.84(25.73,97.73)	-0.21(-0.30,-0.11)
South Africa	7846.72(6968.46,8708.82)	16.66(15.09,18.37)	-0.50(-0.65,-0.36)	1967.54(1748.22,2190.43)	3.96(3.54,4.36)	-0.49(-0.63,-0.34)	540.44(382.28,683.56)	1.61(1.13,2.01)	-0.36(-0.52,-0.19)	10015.70(6976.63,12561.35)	25.06(17.95,31.41)	-0.69(-0.95,-0.42)
South Sudan	378.48(314.23,456.69)	10.69(9.01,12.79)	0.28(0.13,0.43)	30.40(22.94,38.73)	0.47(0.39,0.57)	-0.31(-0.38,-0.25)	76.59(35.03,147.15)	2.29(1.07,4.44)	0.25(0.14,0.35)	2374.76(1046.06,4502.10)	50.09(22.78,96.43)	0.32(0.12,0.52)
Spain	6262.92(5652.13,6905.37)	5.70(5.13,6.36)	0.66(0.48,0.83)	1516.88(1352.29,1680.65)	1.43(1.29,1.59)	0.86(0.65,1.07)	652.35(502.38,749.78)	0.44(0.34,0.50)	0.39(-0.34,1.12)	7172.13(5784.31,8181.75)	5.30(4.39,5.99)	-2.17(-2.61,-1.72)
Sri Lanka	841.83(736.74,979.09)	3.49(3.09,4.01)	0.06(-0.00,0.12)	198.19(170.58,232.28)	0.80(0.70,0.93)	-0.10(-0.19,-0.01)	88.64(49.45,136.49)	0.40(0.22,0.60)	0.06(-0.44,0.57)	1577.68(852.21,2406.87)	6.54(3.65,9.79)	1.08(0.60,1.57)
Sudan	2948.54(2516.97,3357.48)	10.64(9.35,12.00)	0.14(0.12,0.15)	755.27(638.36,868.01)	2.51(2.19,2.83)	-0.20(-0.27,-0.13)	148.43(79.34,278.29)	1.00(0.54,1.89)	1.66(1.47,1.86)	3513.78(1827.87,6393.60)	17.63(9.73,32.36)	1.70(1.55,1.85)
Suriname	449.68(414.80,491.87)	76.44(70.25,83.84)	0.33(0.29,0.36)	118.90(108.45,129.39)	20.19(18.39,22.04)	0.32(0.29,0.35)	31.71(22.57,42.45)	5.50(3.89,7.42)	-0.28(-0.49,-0.08)	656.78(466.89,880.77)	108.46(78.05,144.97)	-0.13(-0.54,0.28)
Sweden	1893.20(1675.92,2150.82)	10.53(9.31,11.99)	-0.12(-0.74,0.49)	501.30(442.87,569.83)	2.81(2.49,3.20)	-0.06(-0.68,0.56)	26.77(21.44,30.82)	0.09(0.07,0.10)	-1.89(-3.39,-0.36)	399.32(336.24,458.08)	1.63(1.37,1.89)	-4.86(-5.54,-4.18)
Switzerland	1425.20(1283.98,1607.32)	8.28(7.36,9.36)	-0.46(-1.31,0.40)	360.47(323.97,404.44)	2.14(1.90,2.41)	-0.43(-1.26,0.40)	22.38(16.91,26.68)	0.08(0.06,0.10)	-1.32(-1.84,-0.80)	300.74(247.25,351.56)	1.34(1.13,1.56)	-2.62(-3.10,-2.13)
Syrian Arab Republic	1256.96(1078.39,1442.36)	9.32(8.12,10.55)	-0.26(-0.36,-0.15)	335.41(287.06,384.33)	2.48(2.17,2.79)	-0.25(-0.35,-0.15)	2.06(1.36,2.72)	0.03(0.02,0.03)	0.11(-0.21,0.42)	96.74(73.88,123.86)	0.81(0.64,1.01)	-0.65(-0.75,-0.55)
Taiwan (Province of China)	4953.56(4459.20,5461.30)	11.73(10.61,12.93)	-1.25(-1.64,-0.86)	1281.41(1155.53,1423.10)	3.05(2.75,3.39)	-0.78(-1.09,-0.47)	352.93(296.79,403.03)	0.78(0.66,0.88)	-2.34(-3.23,-1.45)	5012.06(4348.87,5655.44)	11.64(10.15,13.09)	-5.36(-5.78,-4.95)
Tajikistan	236.18(200.14,276.04)	4.24(3.71,4.89)	-0.14(-0.18,-0.10)	62.28(52.75,73.30)	1.11(0.97,1.28)	-0.15(-0.19,-0.11)	0.03(0.00,0.09)	0.00(0.00,0.00)	-2.83(-3.33,-2.32)	12.05(8.02,16.76)	0.21(0.14,0.29)	-0.58(-0.66,-0.50)
Thailand	9819.46(8940.62,10736.19)	9.34(8.53,10.18)	1.29(0.95,1.63)	1942.06(1756.37,2157.70)	1.88(1.71,2.07)	1.45(1.30,1.59)	1846.35(923.04,2629.98)	1.72(0.85,2.44)	-0.11(-0.68,0.46)	31721.08(14615.96,46116.58)	30.89(14.13,44.92)	1.02(0.32,1.72)
Timor-Leste	52.05(46.54,58.50)	7.40(6.69,8.26)	0.33(0.22,0.44)	10.38(9.10,11.83)	1.27(1.15,1.44)	0.41(0.37,0.44)	9.96(5.09,16.12)	1.52(0.83,2.40)	0.06(-0.08,0.19)	231.67(101.07,396.37)	27.75(13.40,45.97)	0.38(0.21,0.56)
Togo	183.14(149.57,220.51)	3.36(2.89,3.86)	0.09(0.03,0.14)	48.04(38.50,57.81)	0.84(0.71,0.97)	0.04(-0.01,0.09)	0.47(0.12,0.84)	0.01(0.00,0.02)	0.20(-0.21,0.61)	29.64(14.07,49.58)	0.48(0.24,0.75)	2.14(1.74,2.54)
Tokelau	0.09(0.08,0.10)	6.34(5.72,7.05)	0.10(0.04,0.16)	0.02(0.01,0.02)	1.14(1.02,1.28)	0.17(0.16,0.18)	0.02(0.01,0.03)	1.27(0.67,1.90)	0.10(0.06,0.15)	0.38(0.20,0.59)	26.25(13.75,40.63)	0.01(-0.06,0.09)
Tonga	4.60(4.14,5.11)	5.91(5.34,6.55)	0.69(0.59,0.79)	0.93(0.83,1.05)	1.16(1.04,1.30)	0.31(0.27,0.35)	0.85(0.43,1.36)	1.13(0.59,1.80)	0.78(0.66,0.90)	17.03(7.58,29.80)	21.34(9.76,36.70)	0.68(0.53,0.84)
Trinidad and Tobago	677.50(614.27,753.58)	38.69(35.03,42.94)	-0.56(-0.60,-0.53)	177.17(158.71,195.97)	10.13(9.12,11.24)	-0.56(-0.60,-0.52)	21.64(17.24,26.34)	1.21(0.96,1.47)	-2.47(-2.65,-2.28)	369.14(296.98,454.16)	20.28(16.36,24.87)	-2.63(-2.85,-2.41)
Tunisia	1354.25(1181.78,1529.70)	11.06(9.77,12.49)	0.35(0.30,0.39)	323.13(282.44,365.13)	2.54(2.22,2.86)	-0.19(-0.25,-0.14)	115.32(58.19,218.15)	1.05(0.54,1.99)	1.94(1.63,2.26)	2017.00(990.87,3829.39)	16.82(8.46,31.50)	2.31(2.12,2.50)
Türkiye	11025.04(9758.77,12355.97)	12.38(10.92,13.84)	-0.04(-0.07,-0.01)	2918.78(2571.87,3276.20)	3.27(2.91,3.66)	-0.03(-0.06,-0.00)	207.79(104.77,282.25)	0.26(0.13,0.36)	-0.08(-0.37,0.22)	3619.60(1967.46,4652.80)	4.27(2.39,5.51)	0.05(-0.03,0.13)
Turkmenistan	162.68(141.68,188.22)	4.33(3.80,5.03)	0.25(0.18,0.32)	43.05(37.47,50.07)	1.14(1.00,1.32)	0.06(0.04,0.08)	0.10(0.07,0.14)	0.00(0.00,0.00)	0.28(0.24,0.33)	10.21(7.52,13.50)	0.26(0.19,0.34)	0.19(0.12,0.25)
Tuvalu	0.61(0.55,0.69)	7.20(6.50,8.06)	0.30(-0.09,0.68)	0.11(0.09,0.12)	1.17(1.05,1.31)	0.28(-0.09,0.65)	0.12(0.06,0.18)	1.46(0.79,2.15)	0.86(0.44,1.28)	2.90(1.32,4.51)	29.42(13.94,44.36)	0.08(-0.39,0.54)
Uganda	1177.96(980.48,1406.61)	8.17(6.96,9.64)	-0.19(-0.36,-0.02)	130.57(97.08,168.09)	0.48(0.40,0.57)	-0.18(-0.24,-0.13)	220.13(110.89,404.02)	1.73(0.94,3.10)	0.08(-0.05,0.22)	6539.31(2978.74,12245.37)	36.01(17.97,65.78)	-0.30(-0.51,-0.08)
Ukraine	14830.26(13071.40,16965.00)	22.29(19.74,25.24)	-0.37(-0.47,-0.27)	3948.71(3483.98,4509.84)	5.95(5.30,6.68)	-0.37(-0.47,-0.27)	14.92(10.94,19.47)	0.02(0.02,0.03)	2.97(2.03,3.92)	1071.57(823.36,1377.04)	1.67(1.29,2.12)	-0.03(-0.31,0.25)
United Arab Emirates	1134.74(931.69,1355.50)	11.78(10.32,13.21)	0.05(-0.09,0.18)	311.15(250.56,372.89)	3.01(2.63,3.39)	-0.15(-0.23,-0.06)	3.75(1.63,6.69)	0.47(0.23,0.75)	-0.32(-0.92,0.27)	148.32(89.33,217.52)	7.15(3.55,11.43)	-0.69(-1.55,0.18)
United Kingdom	35597.36(31784.31,40491.90)	29.06(25.84,32.65)	0.05(-0.25,0.35)	9243.89(8229.79,10438.30)	7.60(6.78,8.53)	0.10(-0.22,0.41)	172.00(144.94,186.40)	0.11(0.09,0.12)	-4.65(-5.37,-3.93)	3645.56(3123.76,4209.92)	2.72(2.30,3.18)	-4.87(-5.37,-4.38)
United Republic of Tanzania	2049.46(1718.56,2480.62)	8.55(7.23,10.13)	-0.54(-0.62,-0.47)	194.52(146.72,247.15)	0.48(0.40,0.58)	-0.19(-0.24,-0.14)	400.62(216.59,820.34)	1.82(0.99,3.54)	-0.39(-0.46,-0.32)	11050.64(5692.39,23119.24)	37.76(20.61,76.94)	-0.65(-0.71,-0.58)
United States of America	706150.43(640984.77,774801.46)	119.18(108.70,130.46)	0.01(-0.11,0.13)	188420.32(168469.47,207803.84)	31.83(28.67,35.04)	-0.03(-0.14,0.09)	1411.03(1182.48,1626.04)	0.22(0.19,0.26)	-2.24(-2.47,-2.01)	50614.65(41960.83,59889.90)	8.70(7.22,10.30)	-1.10(-1.20,-1.00)
United States Virgin Islands	112.04(101.37,125.15)	65.26(59.59,71.81)	0.53(0.46,0.60)	29.56(26.54,32.79)	17.25(15.69,18.88)	0.53(0.46,0.60)	3.70(2.64,5.14)	2.35(1.68,3.27)	-0.36(-0.56,-0.16)	62.98(44.52,88.17)	41.50(29.43,58.76)	-0.51(-0.75,-0.27)
Uruguay	1354.44(1221.38,1500.45)	21.66(19.63,23.87)	0.09(-0.05,0.23)	332.73(296.55,367.38)	5.38(4.81,5.93)	0.08(-0.04,0.20)	156.37(134.43,171.80)	2.26(1.97,2.46)	1.35(0.91,1.79)	2164.02(1916.39,2347.47)	34.98(31.52,37.94)	1.08(0.35,1.81)
Uzbekistan	1017.85(879.53,1186.33)	4.35(3.82,5.03)	-0.01(-0.05,0.04)	268.00(229.28,313.96)	1.15(1.00,1.31)	0.01(-0.04,0.05)	0.01(0.01,0.02)	0.00(0.00,0.00)	1.55(1.27,1.83)	47.44(31.16,65.14)	0.20(0.13,0.28)	-0.03(-0.07,0.01)
Vanuatu	10.24(8.92,11.79)	7.01(6.29,7.91)	0.56(0.49,0.62)	1.76(1.50,2.05)	1.07(0.96,1.22)	0.40(0.37,0.43)	1.89(0.57,3.87)	1.43(0.48,2.75)	0.54(0.48,0.59)	54.47(14.11,115.60)	30.06(9.21,61.83)	0.51(0.44,0.57)
Venezuela (Bolivarian Republic of)	19482.58(17375.02,21963.43)	67.72(60.32,76.24)	-0.09(-0.17,0.00)	5209.16(4600.09,5866.18)	18.10(16.09,20.44)	-0.08(-0.17,0.01)	23.30(17.73,29.42)	0.08(0.06,0.11)	-1.54(-1.91,-1.18)	1260.65(958.23,1571.96)	4.39(3.35,5.46)	-1.02(-1.18,-0.86)
Viet Nam	3739.00(3268.44,4335.64)	4.26(3.78,4.91)	0.06(-0.07,0.19)	812.97(699.24,965.72)	0.87(0.76,1.02)	-0.26(-0.31,-0.21)	370.18(94.57,654.50)	0.50(0.13,0.88)	-0.24(-0.82,0.35)	6352.20(1738.51,10371.56)	7.50(2.07,12.56)	-0.12(-1.09,0.87)
Yemen	2091.41(1773.51,2418.30)	9.68(8.53,10.85)	-0.18(-0.24,-0.12)	552.89(466.34,637.89)	2.45(2.15,2.73)	-0.28(-0.35,-0.21)	67.88(41.10,108.68)	0.68(0.41,1.14)	0.58(0.50,0.67)	1690.50(1038.36,2633.18)	12.10(7.44,19.15)	0.41(0.31,0.52)
Zambia	643.76(529.61,773.02)	9.88(8.30,11.73)	-1.01(-1.58,-0.43)	61.15(46.28,78.41)	0.48(0.40,0.57)	-0.19(-0.24,-0.14)	126.30(71.80,196.43)	2.12(1.27,3.30)	-0.52(-0.92,-0.11)	3843.41(2170.99,6170.98)	45.13(26.12,71.18)	-1.48(-2.16,-0.79)
Zimbabwe	1902.22(1663.57,2137.31)	25.75(23.12,28.70)	1.10(0.74,1.46)	408.33(351.80,464.27)	3.76(3.35,4.18)	-0.23(-0.29,-0.16)	172.77(63.40,282.59)	4.20(1.57,6.98)	1.26(0.81,1.71)	3967.68(1337.91,6304.90)	69.25(26.02,111.55)	2.37(1.72,3.03)

## Sheet: Table S3
Table S3 APC of DUs from 1990 to 2021 for the World and SDI.
Characteristics		Incidence(95% CI)		Prevalence(95% CI)		Death(95% CI)		DALYs(95% CI)
		APCs	P	APCs	P	APCs	P	APCs	P
Global
	slope1	0.005(-0.445,0.456)		0.033(-0.429,0.498)		-0.314(-0.442,-0.186)	*	-0.337(-0.540,-0.135)	*
	slope2	-0.492(-0.545,-0.439)	*	-0.501(-0.555,-0.446)	*	-2.060(-2.203,-1.916)	*	-1.384(-1.462,-1.307)	*
	slope3	1.700(1.495,1.905)	*	1.702(1.491,1.913)	*	1.942(1.569,2.317)	*	2.098(1.777,2.420)	*
	slope4	-0.520(-0.573,-0.467)	*	-0.545(-0.600,-0.491)	*	-0.257(-1.333,0.830)		0.322(-0.608,1.260)
Low SDI
	slope1	0.112(-0.071,0.295)		-0.032(-0.061,-0.002)	*	0.482(0.044,0.922)	*	-0.010(-0.234,0.214)
	slope2	-0.455(-0.510,-0.400)	*	4.111(3.856,4.367)	*	-2.025(-2.222,-1.828)	*	-2.478(-2.627,-2.328)	*
	slope3	2.784(2.519,3.050)	*	-1.000(-1.071,-0.930)	*	-0.813(-1.384,-0.238)	*	-0.975(-1.345,-0.602)	*
	slope4	-0.354(-0.402,-0.306)	*	-0.114(-0.501,0.274)		1.570(1.393,1.747)	*	1.140(1.026,1.255)	*
Low middle SDI
	slope1	0.396(0.346,0.446)	*	0.465(0.403,0.528)	*	-0.033(-0.674,0.612)		-0.565(-1.040,-0.087)	*
	slope2	1.078(0.911,1.245)	*	1.343(1.206,1.481)	*	-3.703(-4.320,-3.081)	*	-4.739(-5.404,-4.068)	*
	slope3	4.494(4.250,4.738)	*	4.749(4.484,5.015)	*	0.574(-0.423,1.582)		0.585(-0.303,1.481)
	slope4	-0.146(-0.189,-0.102)	*	-0.452(-0.499,-0.405)	*	4.379(3.901,4.859)	*	4.155(3.730,4.581)	*
Middle SDI
	slope1	0.096(-0.245,0.438)		0.143(0.086,0.201)	*	-0.235(-0.437,-0.032)	*	-0.783(-0.928,-0.638)	*
	slope2	0.280(0.160,0.399)	*	0.934(0.742,1.127)	*	1.593(0.277,2.927)	*	0.934(-0.010,1.886)
	slope3	3.696(3.343,4.051)	*	4.012(3.732,4.292)	*	-1.049(-1.250,-0.848)	*	-0.851(-0.976,-0.725)	*
	slope4	-0.270(-0.360,-0.180)	*	-0.298(-0.348,-0.248)	*	1.014(0.774,1.255)	*	1.356(1.149,1.564)	*
High middle SDI
	slope1	-0.241(-0.470,-0.012)	*	-0.276(-0.612,0.062)		-1.435(-2.704,-0.150)	*	-0.318(-1.197,0.568)
	slope2	0.993(0.935,1.051)	*	0.806(0.716,0.896)	*	6.678(6.491,6.864)	*	5.012(4.783,5.241)	*
	slope3	-1.228(-1.375,-1.082)	*	1.752(0.986,2.524)	*	-1.899(-2.131,-1.667)	*	-1.165(-1.380,-0.949)	*
	slope4	0.043(-0.634,0.725)		-1.015(-1.103,-0.926)	*	0.407(0.170,0.645)	*	1.079(0.771,1.388)	*
High SDI
	slope1	0.553(0.371,0.735)	*	0.599(0.404,0.794)	*	-0.776(-1.313,-0.237)	*	-0.769(-1.036,-0.501)	*
	slope2	-0.649(-0.703,-0.594)	*	-0.651(-0.709,-0.593)	*	-3.116(-3.640,-2.589)	*	-2.636(-2.712,-2.561)	*
	slope3	0.606(0.349,0.864)	*	0.563(0.128,1.000)	*	-4.740(-4.946,-4.534)	*	0.373(0.104,0.644)	*
	slope4	-0.066(-0.114,-0.018)	*	-0.064(-0.109,-0.019)	*	-0.182(-0.473,0.111)		-1.721(-3.681,0.279)
APC, Average percentage change; DALYs, Disability-adjusted life years;SDI, Socio-demographic Index.

## Sheet: Table S4
Table S4. SDI-related health inequality slope index and relative concentration index for the global burden of DUs, 1990 and 2021.
Characteristics	ASIR	ASPR	ASMR	ASDR
Inequality Slope Index
1990	18.84(11.60, 26.09)	5.51(3.62, 7.40)	-0.30(-0.70, 0.10)	-8.89(-16.42, -1.36)
2021	18.24(11.23, 25.24)	5.35(3.52, 7.18)	-0.46(-0.83, -0.10)	-10.73(-17.30, -4.15)
Relative Concentration Index
1990	0.19(0.11, 0.26)	0.22(0.14, 0.30)	0.01(−0.09, 0.11)	−0.04(−0.13, 0.06)
2021	0.18(0.10, 0.25)	0.21(0.13, 0.29)	−0.03(−0.13, 0.05)	−0.07(−0.16, 0.02)
